# Supplementary material
Source: PubMed Central journal article supplement (PMC10305912)
Supplement: mmc1.pdf [file mmc1.pdf]

## **SUPPLEMENT**

### **Dietary weight-management for type 2 diabetes remissions in South Asians: The South Asian diabetes remission randomised trial for proof-of-concept and feasibility (STANDbY)**

Naveed Sattar, Paul Welsh, Wilma S Leslie, George Thom, Louise McCombie, Naomi

Brosnahan, Janice Richardson, Jason MR Gill, Luisa Crawford, Michael EJ Lean

**Supplementary Table 1** Change in outcome variables during the RCT (PP analysis)

| Factor                                    | Change in dTDR<br>(control) | Change in iTDR        | p-value | Between group change<br>(95% CI) |
|-------------------------------------------|-----------------------------|-----------------------|---------|----------------------------------|
|                                           | N=12                        | N=13                  |         |                                  |
| Weight (Kg)                               | -1.1 (1.3)<br>(n=10)        | -7.8 (7.8)<br>(n=12)  | 0.015   | -6.7 (-11.9, -1.5)               |
| Weight (% change)                         | -1.4 (1.5)<br>(n=10)        | -8.3 (7.1)<br>(n=12)  | 0.007   | -6.9 (-11.7, -2.1)               |
| Weight change category                    |                             |                       |         |                                  |
| <5% weight loss                           | 10 (100%)                   | 4 (33%)               | 0.004   | -                                |
| 5-9.9% weight loss                        | 0 (0%)                      | 2 (17%)               |         | -                                |
| >10% weight loss                          | 0 (0%)                      | 6 (50%)               |         | -                                |
| Remission                                 | 0 (0%)                      | 5 (38%)               | 0.039   | -                                |
| HbA1C (mmol/mol)                          | -0.9 (6.2)<br>(n=10)        | -6.5 (11.7)<br>(n=11) | 0.20    | -5.6 (-14.3, 3.2)                |
| Taking antidiabetic medication            | 7 (70%)<br>(n=10)           | 2 (17%)<br>(n=12)     | 0.027   | -                                |
| Taking antihypertensive medication        | 4 (50%)<br>(n=8)            | 0 (0%)<br>(n=9)       | 0.029   | -                                |
| Waist circumference (cm)                  | 0.2 (5.3)<br>(n=10)         | -6.2 (5.7)<br>(n=10)  | 0.017   | -6.5 (-11.6, -1.3)               |
| SBP (mmHg)                                | -6.2 (19.1)<br>(n=10)       | -4.3 (11.5)<br>(n=12) | 0.77    | 1.9 (-11.8, 15.6)                |
| Glucose (mmol/L)                          | -0.6 (1.8)<br>(n=10)        | -1.2 (1.6)<br>(n=11)  | 0.41    | -0.6 (-2.2, 0.9)                 |
| Total cholesterol (mmol/L)                | -0.1 (0.4)<br>(n=10)        | -0.1 (1.2)<br>(n=11)  | 0.92    | -0.0 (-0.9, 0.8)                 |
| HDL-cholesterol (mmol/L)                  | 0.0 (0.2)<br>(n=10)         | 0.0 (0.2)<br>(n=11)   | 0.83    | 0.0 (-0.1, 0.2)                  |
| Triglycerides (mmol/L)                    | -0.3 (0.8)<br>(n=10)        | 0.0 (1.5)<br>(n=11)   | 0.59    | 0.3 (-0.8, 1.4)                  |
| Urea (mmol/L)                             | 0.1 (1.3)<br>(n=10)         | 0.2 (1.2)<br>(n=11)   | 0.83    | 0.1 (-1.0, 1.2)                  |
| Uric acid (mg/dL)                         | -0.3 (0.7)<br>(n=10)        | 0.1 (1.4)<br>(n=11)   | 0.34    | 0.5 (-0.5, 1.4)                  |
| Estimated glomerular filtration rate      | 1.3 (6.5)<br>(n=10)         | -0.6 (11.4)<br>(n=11) | 0.65    | -1.9 (-10.5, 6.7)                |
| GGT (U/L)                                 | -20 (73)<br>(n=10)          | -3 (16)<br>(n=11)     | 0.47    | 17 (-31, 64)                     |
| ALT (U/L)                                 | -3 (8)<br>(n=10)            | -3 (12)<br>(n=11)     | 0.98    | 0 (-10, 10)                      |
| AST (U/L)                                 | -2 (4)<br>(n=10)            | 1 (8)<br>(n=11)       | 0.32    | 3 (-3, 8)                        |
| C-reactive protein (mg/L)                 | -1.0 (2.4)<br>(n=10)        | -3.2 (5.9)<br>(n=11)  | 0.27    | -2.3 (-6.5, 1.9)                 |
| Ferritin (ug/L)                           | -9 (18)<br>(n=10)           | 6 (37)<br>(n=11)      | 0.26    | 15 (-12, 42)                     |
| Insulin (uU/ml)                           | -2.8 (8.8)<br>(n=10)        | -9.4 (16.3)<br>(n=11) | 0.27    | -6.6 (-18.7, 5.6)                |
| HOMA-IR                                   | -2.2 (4.9)<br>(n=10)        | -3.8 (5.5)<br>(n=11)  | 0.48    | -1.6 (-6.4, 3.2)                 |
| Total adipose tissue volume (L)           | -0.7 (0.8)<br>(n=9)         | -5.1 (4.5)<br>(n=11)  | 0.009   | -4.4 (-7.6, -1.3)                |
| Abdominal subcutaneous adipose tissue (L) | -0.2 (0.5)<br>(n=9)         | -1.9 (2.0)<br>(n=11)  | 0.021   | -1.8 (-3.2, -0.3)                |
| Lean volume (L)                           | -0.1 (0.4)<br>(n=9)         | -0.9 (1.1)<br>(n=11)  | 0.036   | -0.8 (-1.6, -0.1)                |
| Liver fat (%)                             | -1.8 (3.5)<br>(n=9)         | -8.2 (8.2)<br>(n=11)  | 0.044   | -6.4 (-12.6, -0.2)               |
| Visceral adipose tissue volume (L)        | -0.1 (0.4)<br>(n=9)         | -1.1 (0.7)<br>(n=11)  | 0.001   | -1.0 (-1.5, -0.5)                |

Data are for within group change are count (%) or mean (SD)

**Supplementary Table 2** Adverse events during the RCT phase

| Adverse Event    | dTDR (control) | iTDR    | p-value |
|------------------|----------------|---------|---------|
|                  | N=12           | N=13    |         |
| Diarrhea         | 0 (0%)         | 0 (0%)  | 0.99    |
| Nausea           | 0 (0%)         | 0 (0%)  | 0.99    |
| Constipation     | 0 (0%)         | 3 (23%) | 0.22    |
| Dizziness        | 0 (0%)         | 1 (8%)  | 0.99    |
| Indigestion      | 0 (0%)         | 0 (0%)  | 0.99    |
| Headache         | 0 (0%)         | 4 (31%) | 0.096   |
| Mood change      | 0 (0%)         | 1 (8%)  | 0.99    |
| Cold sensitivity | 0 (0%)         | 0 (0%)  | 0.99    |
| Hair loss        | 0 (0%)         | 2 (15%) | 0.48    |
| Fatigue          | 0 (0%)         | 1 (8%)  | 0.99    |
| Other            | 0 (0%)         | 1 (8%)  | 0.99    |

**Supplementary Table 3** Change in outcome variables from baseline, after intervention in all participants (combined iTDR and dTDR) (PP analysis)

| Factor                                                             |         | Change    | Lower 95% CI | Upper 95% CI | p-value |
|--------------------------------------------------------------------|---------|-----------|--------------|--------------|---------|
| Weight (Kg)                                                        | 20      | -7.8      | -10.7        | -4.9         | <0.001  |
| Weight (% change)                                                  | 20      | -8.8      | -11.6        | -5.9         | <0.001  |
| Weight change category n (%)                                       |         |           |              |              | <0.001  |
| <5% weight loss                                                    | 6 (30%) | -         | -            | -            |         |
| 5-9.9% weight loss                                                 | 6 (30%) | -         | -            | -            |         |
| >10% weight loss                                                   | 8 (40%) | -         | -            | -            |         |
| Remission (%)                                                      | 21      | 10 (48%)  | 26%          | 69%          | <0.001  |
| HbA1C (mmol/mol)                                                   | 21      | -7.9      | -13.5        | -2.3         | 0.008   |
| Change in taking antidiabetic medications                          | 20      | -6 (-30%) | -59%         | 0%           | 0.07    |
| Change in taking antihypertensive medication                       | 17      | 0 (0%)    | -22%         | 22%          | 0.99    |
| Waist circumference (cm)                                           | 18      | -6.5      | -9.5         | -3.5         | <0.001  |
| SBP (mmHg)                                                         | 20      | -8.3      | -15.1        | -1.5         | 0.019   |
| Glucose (mmol/L)                                                   | 19      | -1.4      | -2.5         | -0.4         | 0.007   |
| Total cholesterol (mmol/L)                                         | 19      | -0.3      | -0.9         | 0.2          | 0.24    |
| HDL-cholesterol (mmol/L)                                           | 19      | -0.1      | -0.2         | 0.1          | 0.30    |
| Triglycerides (mmol/L)                                             | 19      | -0.1      | -0.7         | 0.5          | 0.65    |
| Urea (mmol/L)                                                      | 19      | 0.1       | -0.5         | 0.7          | 0.65    |
| Uric acid (mg/dL)                                                  | 19      | 0.2       | -0.4         | 0.8          | 0.46    |
| Estimated glomerular filtration rate (ml/min/1.73 m <sup>2</sup> ) | 19      | -0.5      | -5.9         | 4.8          | 0.83    |
| GGT (U/L)                                                          | 19      | -12.5     | -27.2        | 2.2          | 0.09    |
| ALT (U/L)                                                          | 19      | -4.2      | -10.1        | 1.8          | 0.16    |
| AST (U/L)                                                          | 19      | -0.3      | -3.9         | 3.4          | 0.88    |
| C-reactive protein (mg/L)                                          | 19      | -2.4      | -4.7         | -0.2         | 0.04    |
| Ferritin (ug/L)                                                    | 19      | 2.4       | -12.8        | 17.6         | 0.75    |
| Insulin (uU/ml)                                                    | 19      | -7.7      | -14.3        | -1.2         | 0.02    |
| HOMA-IR                                                            | 19      | -3.4      | -5.8         | -1.1         | <0.001  |
| Total adipose tissue volume (L)                                    | 18      | -4.9      | -6.8         | -3.1         | <0.001  |
| Lean volume (L)                                                    | 18      | -0.6      | -1.1         | -0.1         | 0.02    |
| Liver fat (%)                                                      | 18      | -8.6      | -12.0        | -5.2         | <0.001  |
| Visceral adipose tissue volume (L)                                 | 18      | -1.3      | -1.6         | -0.9         | <0.001  |
| EQ5D (VAS units)                                                   | 21      | 12.2      | 2.1          | 22.4         | 0.02    |

**Supplementary Table 4** Adverse events during the intervention in all participants (combined iTDR and dTDR)

| Adverse Event    | All participants |
|------------------|------------------|
|                  | N=23             |
| Diarrhea         | 1 (4%)           |
| Nausea           | 0 (0%)           |
| Constipation     | 9 (39%)          |
| Dizziness        | 1 (4%)           |
| Indigestion      | 0 (0%)           |
| Headache         | 9 (39%)          |
| Mood change      | 1 (4%)           |
| Cold sensitivity | 0 (0%)           |
| Hair loss        | 3 (13%)          |
| Fatigue          | 1 (4%)           |
| Other            | 1 (4%)           |

**Supplementary Table 5** Acceptability questionnaire: Curated responses to open questions regarding the diet (rows are not matched responses for a single participant). N=16 participants responded to at least one question.

| What did you like about Counterweight Plus?                                                     | What did you not like about Counterweight Plus?                                             | Anything you would suggest to improve Counterweight Plus for other patients in future?        |
|-------------------------------------------------------------------------------------------------|---------------------------------------------------------------------------------------------|-----------------------------------------------------------------------------------------------|
| Felt good, helped change my lifestyle, liked all flavours.                                      | Disliked some flavours                                                                      | I would recommend the diet to others                                                          |
| Helped me lose weight, liked the flavours, didn't make me feel hungry                           | Disliked many flavours/meals. Customized own diet/exercise plan around intervention         | Stick to food based approaches                                                                |
| Helped me lose weight and gave me motivation. Exercised a lot. Health checks welcome.           | Nothing to dislike                                                                          | More flavours, spicy too, less with milk                                                      |
| Liked the reduced calories. Like the food products. Health checks welcome.                      | Wind and bloating particularly in the first week                                            | Mixing TDR with some solid food                                                               |
| Liked structure for regimented in calorie intake. The products were varied and not distasteful. | Diarrhea                                                                                    | More flavours in the soups and shakes. Longer duration of TDR                                 |
| Liked dietitian support during the intervention. The soups and shakes were flavoursome.         | Dietitian was changed - gap in continuity                                                   | Brilliant diet, don't think improvements needed                                               |
| Liked weight loss - encouraging and motivating.                                                 | Hair loss, boring flavours                                                                  | Not anything I can think of now                                                               |
| Liked weight loss. Diabetes better.                                                             | Miss food, use the shakes selectively                                                       | More spicy options. Food based approach                                                       |
| Quick and easy to use meals.                                                                    | Disliked many flavours/meals, & not filling                                                 | Resolve side-effects                                                                          |
| Liked feedback, encouragement, and support.                                                     | Disliked some flavours (too sweet)                                                          | More variety                                                                                  |
| Liked specific flavours. Tastes close to normal food.                                           | Boring diet                                                                                 | Full variety of listed meal replacements in promotional material should be available          |
| Tasty and easy. Reassuring to know you are getting required vitamins.                           | Disliked many flavours/meals (too sweet, too salty). Overall, not enjoyable to do.          | Support should carry on a bit longer                                                          |
| Liked specific flavours.                                                                        | Difficult in adherence especially in lockdown. Only managed 2 shakes per day with one meal. | More emphasis for all with diabetes to lose weight to reduce or avoid the need for medication |
| Really easy to use and worked around my lifestyle. I was able to achieve my desired goals       | Nothing to dislike                                                                          | Extra meal replacements at completion of TDR                                                  |
| Liked weight loss. Liked feedback, encouragement, and support.                                  |                                                                                             |                                                                                               |
